# Supplementary material for: Stranded assets in EU+UK agriculture during food system transformations
Source: Research Square preprint supplement (doi:10.21203/rs.3.rs-5461463/v1), 2025-01-22
Supplement: Supplementary file 2 [file cb1cd9c3fe72c6ed17893eb7.xlsx]

## Sheet: Table 2. Concordance Table
		2805	2511	2513	2514	2515	2516	2517	2518	2520	2531	2532	2533	2534	2535	2536	2537	2546	2547	2549	2551	2555	2556	2557	2558	328	2560	2561	254	2563	2570	2601	2602	2605	2611	2612	2613	2614	2615	2616	2617	2618	2619	2620	2625	2630	2633	2635	677
	FABIO commodities	Rice (Milled Equivalent)	Wheat and products	Barley and products	Maize and products	Rye and products	Oats	Millet and products	Sorghum and products	Cereals, Other	Potatoes and products	Cassava and products	Sweet potatoes	Roots, Other	Yams	Sugar cane	Sugar beet	Beans	Peas	Pulses, Other and products	Nuts and products	Soyabeans	Groundnuts (Shelled Eq)	Sunflower seed	Rape and Mustardseed	Seed cotton	Coconuts - Incl Copra	Sesame seed	Oil, palm fruit	Olives (including preserved)	Oilcrops, Other	Tomatoes and products	Onions	Vegetables, Other	Oranges, Mandarines	Lemons, Limes and products	Grapefruit and products	Citrus, Other	Bananas	Plantains	Apples and products	Pineapples and products	Dates	Grapes and products (excl wine)	Fruits, Other	Coffee and products	Cocoa Beans and products	Tea (including mate)	Hops
Farmtypes EUROPEAN COMISSIONS
(15) Specialist COP		1	1	1	1	1	1	1	1	1												1		1	1			1	1		1			1
(16) Specialist other fieldcrops											1	1	1	1	1	1	1	1	1	1														1
(20) Specialist horticulture																					1		1			1	1					1	1	1												1
(35) Specialist wine
(36) Specialist orchards - fruits																																			1	1	1	1	1	1	1	1	1	1	1
(37) Specialist olives																														1
(38) Permanent crops combined																																															1	1	1
(45) Specialist milk
(48) Specialist sheep and goats
(49) Specialist cattle
(50) Specialist granivores
(60) Mixed crops		1	1	1	1	1	1	1	1	1	1	1	1	1	1	1	1	1	1	1	1	1	1	1	1	1	1	1	1	1	1	1	1	1	1	1	1	1	1	1	1	1	1	1	1	1	1	1	1
(70) Mixed livestock
(80) Mixed crops and livestock		1	1	1	1	1	1	1	1	1	1	1	1	1	1	1	1	1	1	1	1	1	1	1	1	1	1	1	1	1	1	1	1	1	1	1	1	1	1	1	1	1	1	1	1	1	1	1	1
[truncated: 78 more columns]
